# Supplementary material for: Synthesis, crystal structure of α-Keggin heteropolymolybdates with pyridine-2,6-dicarboxylate based frameworks, and associated RhB photocatalytic degradation and 2D-IR COS tests
Source: Royal Society of Chemistry journal article supplement (doi:10.1039/c2dt00001f), 2012-01-01
Supplement: c2dt00001f.pdf [file c2dt00001f.pdf]

Supporting Information for  
Synthesis, Crystal structure of  $\alpha$ -Keggin heteropolymolybdates with pyridine-2,6-dicarboxylate based frameworks, and associated RhB photocatalytic degradation and 2D-IR-COS test

Compound 1

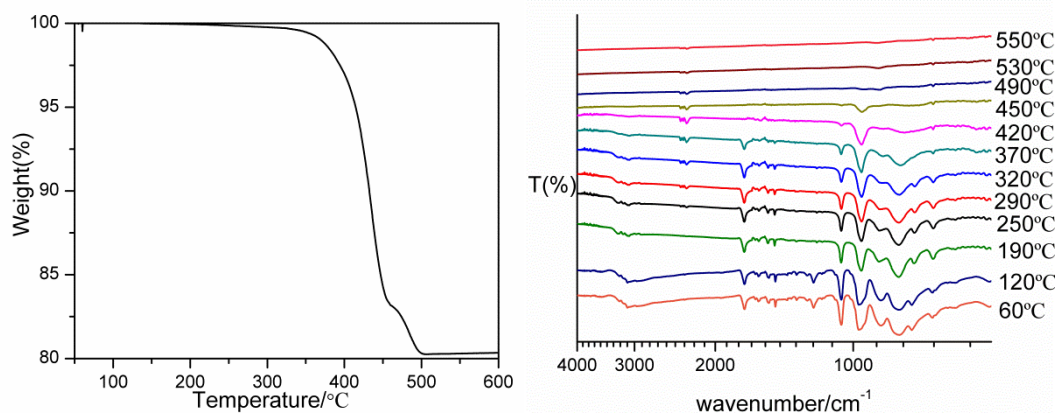

Compound 2

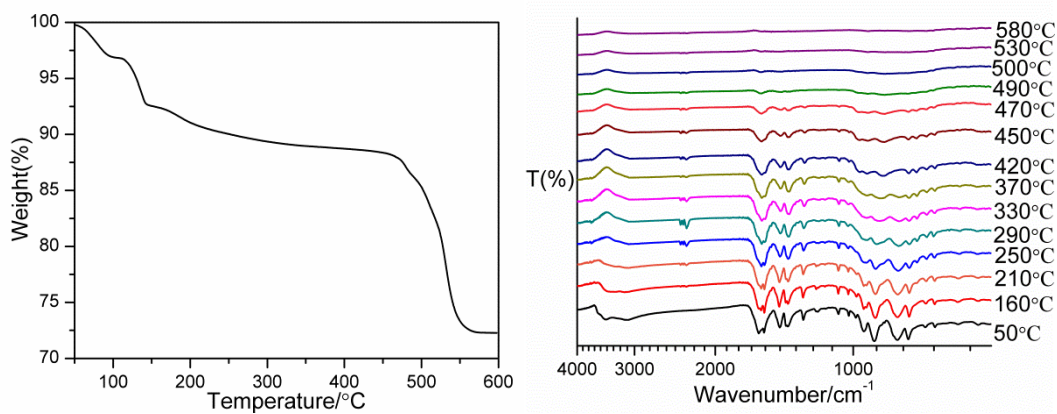

Compound 3

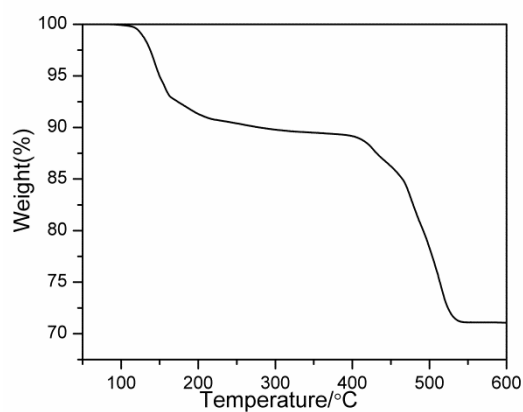

**Fig. S1** Thermogravimetric curves and thermal infrared spectra for compound 1-3

Compound 1

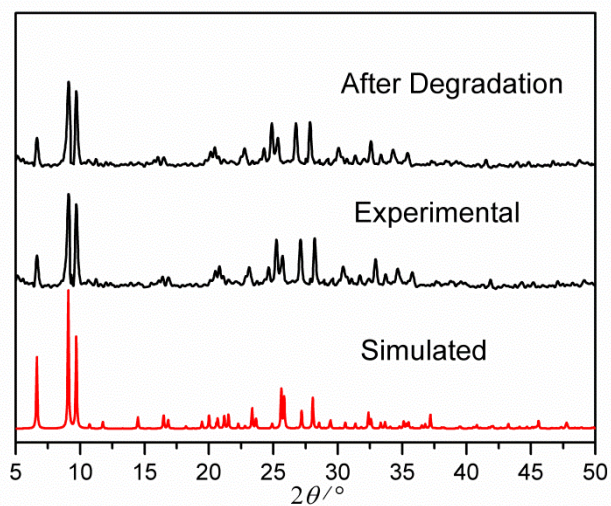

Compound 2

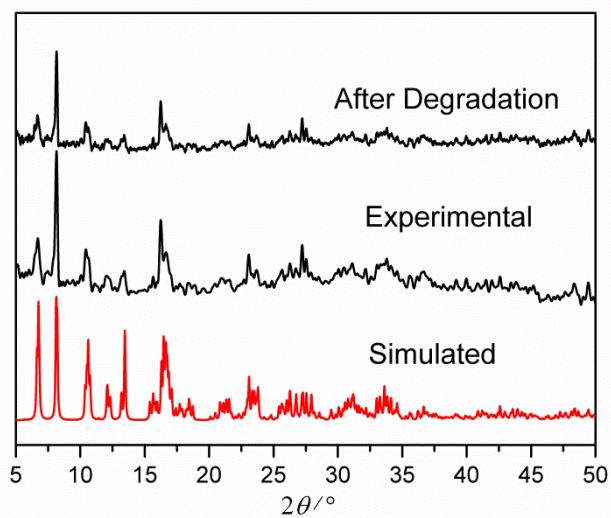

Compound 3

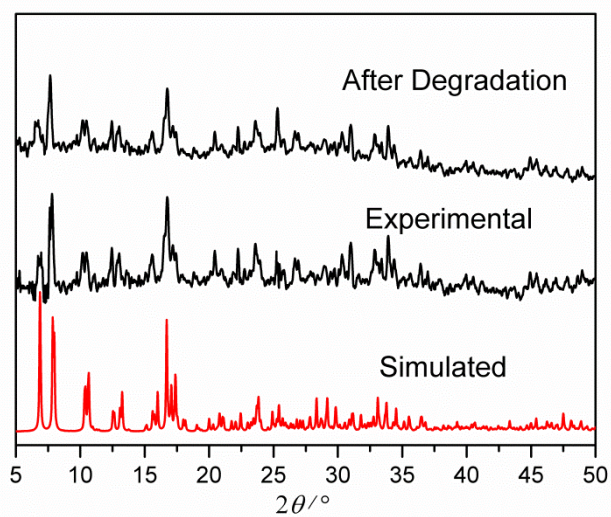

Fig. S2 The powder X-ray diffraction patterns of compound 1-3

Compound 1

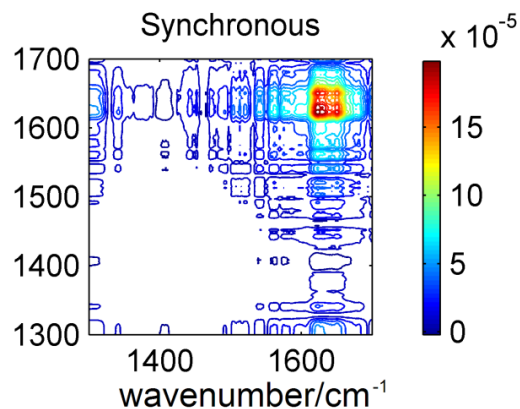

Compound 2

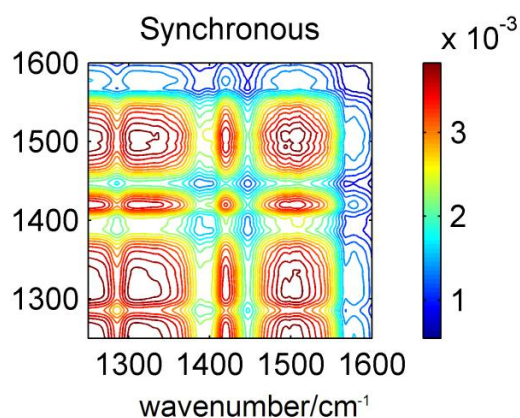

Compound 3

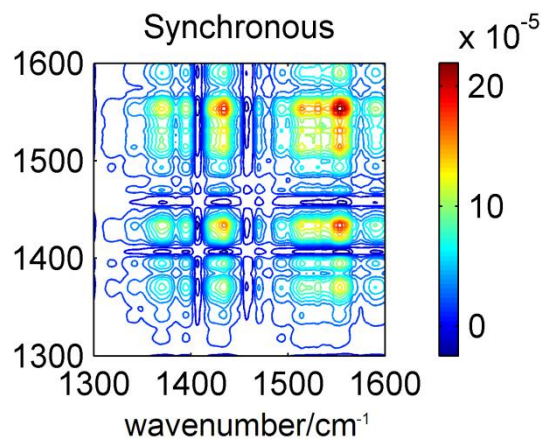

**Fig. S3.1** Magnesium-dependent synchronous correlation IR spectra of compound 1-3 over a magnesium range from 0-50mT

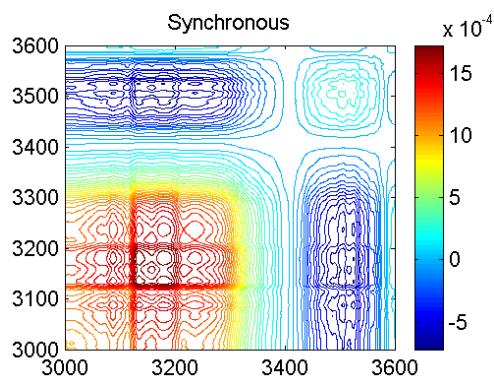

**Fig. S3.2** Temperature-dependent synchronous correlation IR spectra of 2 between 3000-3600cm<sup>-1</sup> over a temperature range from 323 to 393 K

As is shown in Fig. S3.2, obvious inductions appear at  $3200$  and  $3550\text{ cm}^{-1}$ . The auto peaks around  $3200\text{ cm}^{-1}$  are assigned to temperature-induced stretching vibrations of carboxyl O-H bond, and the auto peaks around  $3550\text{ cm}^{-1}$ , which is much weaker, are assigned to temperature-induced stretching vibrations of pyridine N-H bond. So, the hydrogen atoms at the carboxylate O and the pyridine N are both present.

#### Compound 2

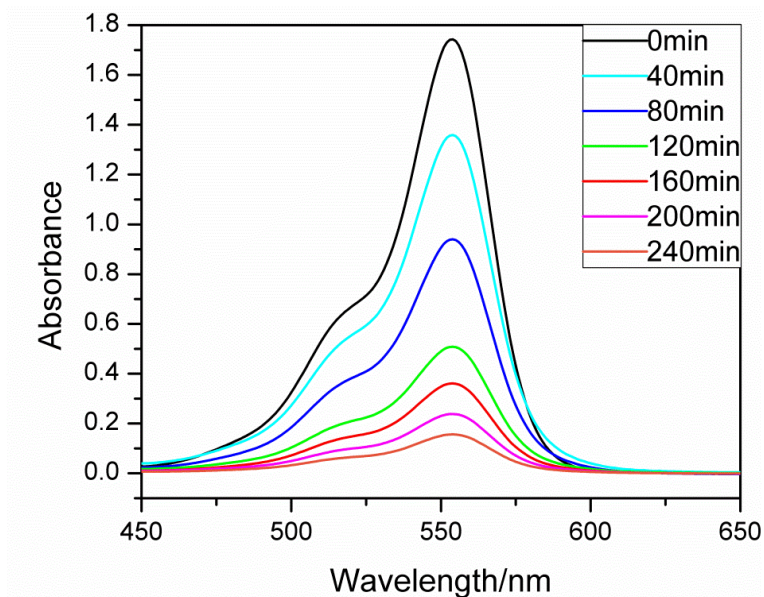

#### Compound 3

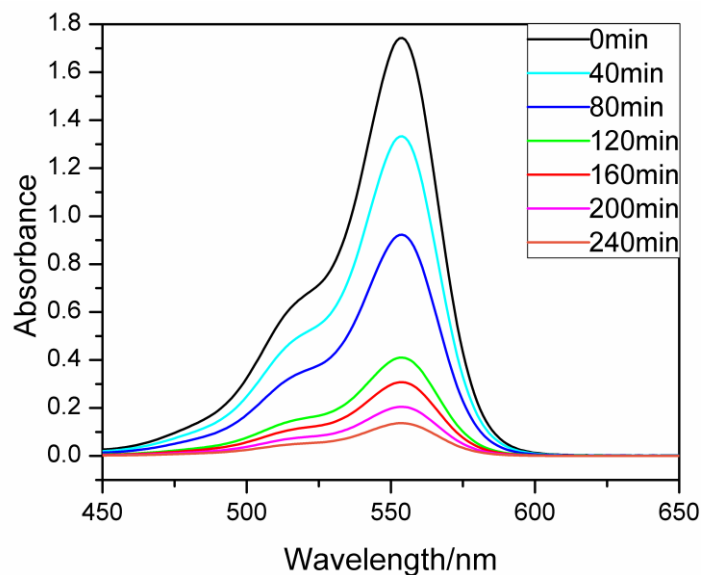

**Fig. S4.1** The UV-vis absorption spectra change of **2** and **3**

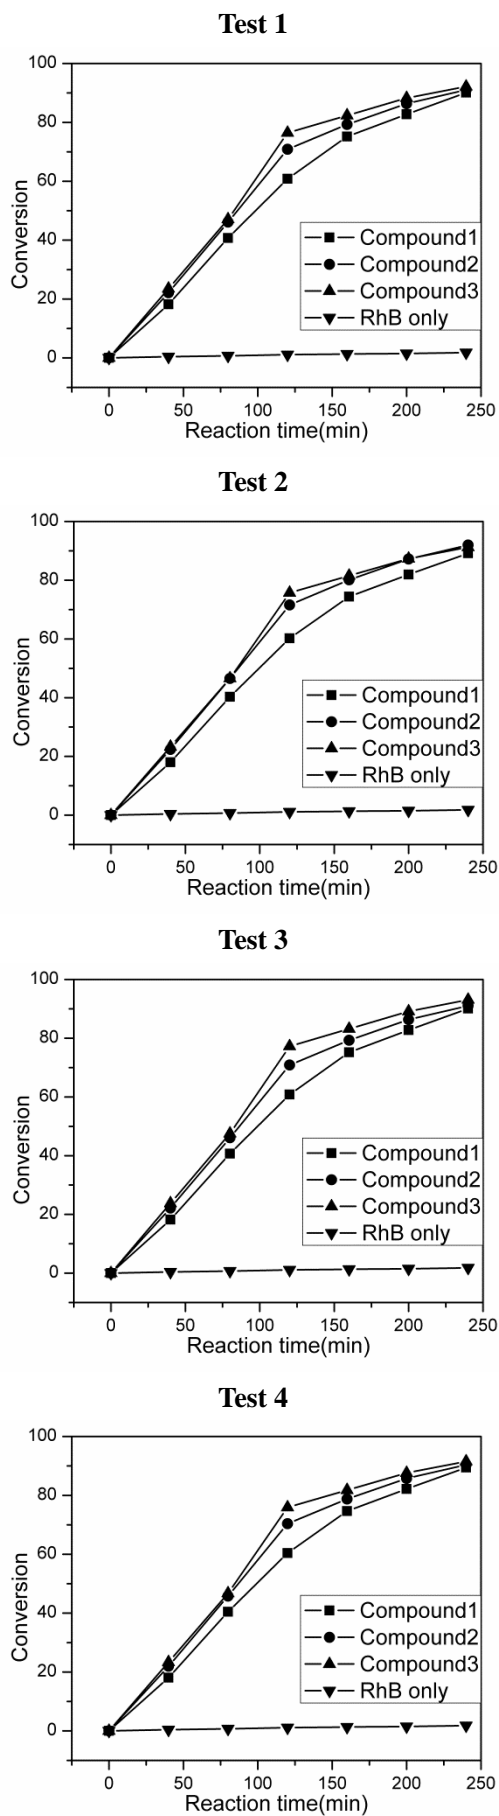

Fig. S4.2 Plots of the conversions of RhB versus reaction time of 1-3 in 4 repeatability tests.

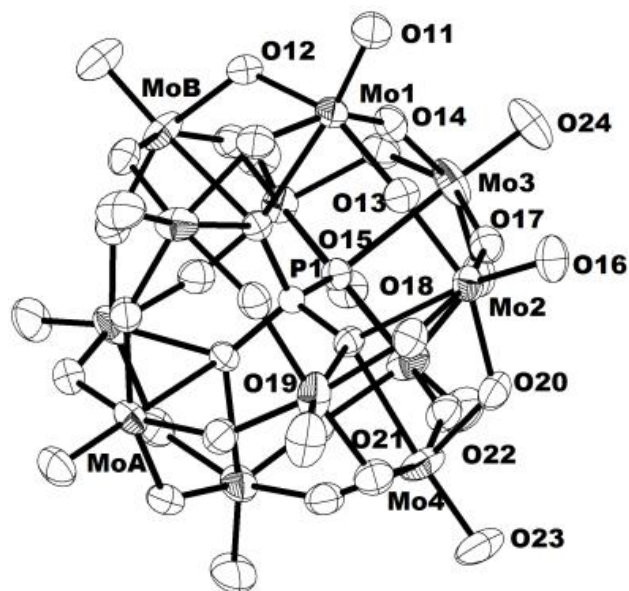

**Fig. S5.1** Crystal structure of  $[\text{PMo}_{12}\text{O}_{40}]^{3-}$  (Symmetry codes: A:  $-y+1, x-y, z$ ; B:  $-x+y+1, -x+1, z$ )

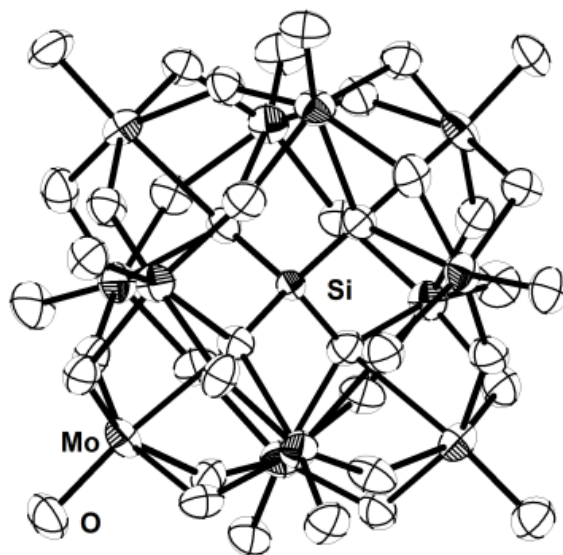

**Fig. S5.2** Crystal structure of  $[\text{SiMo}_{12}\text{O}_{40}]^{4-}$

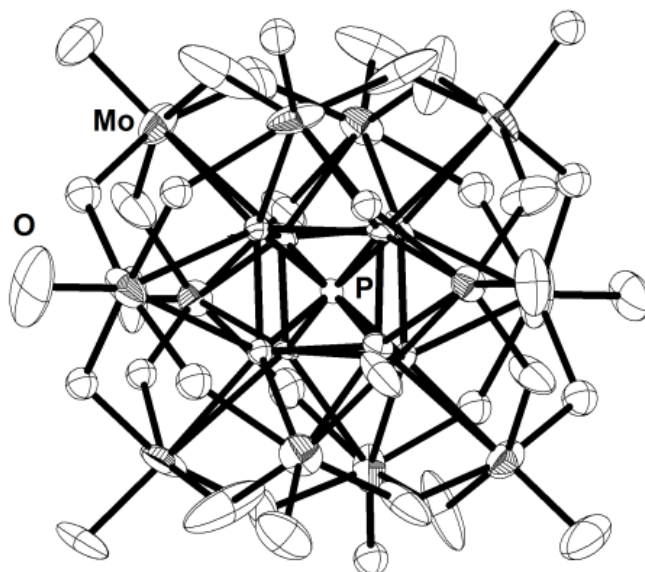

**Fig. S5.3** Crystal structure of  $[\text{PMo}_{12}\text{O}_{40}]^{3-}$ , removed unnecessary split O for clarity.

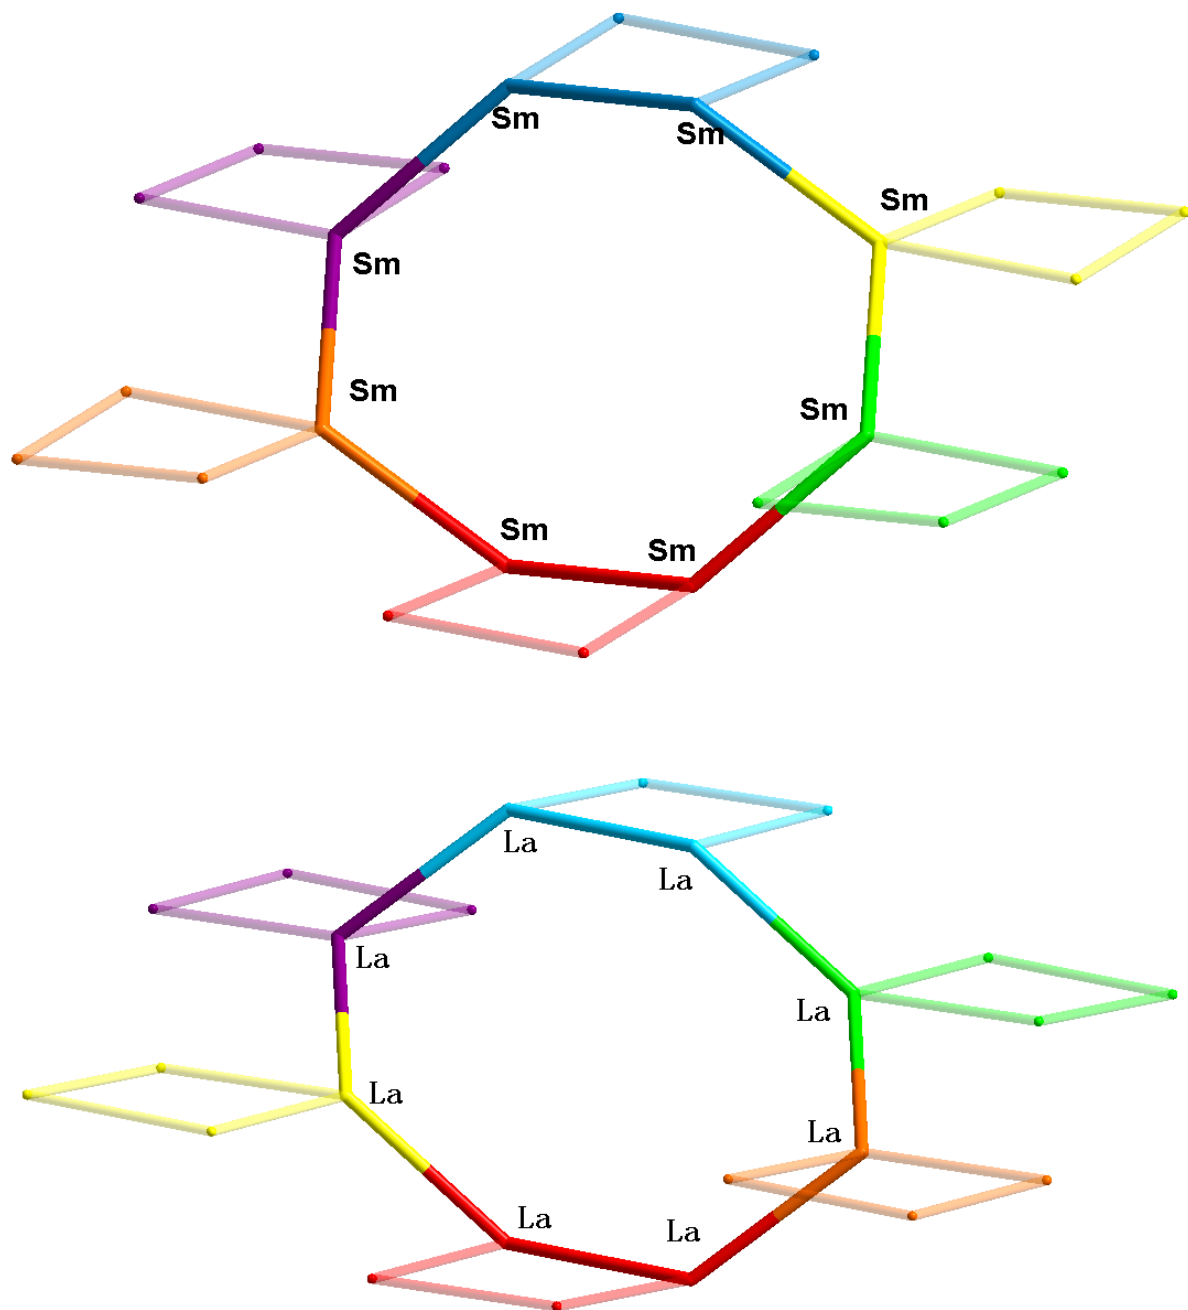

**Fig. S5.4** Octanuclear metallamacrocycle  $\text{Ln}_8(\text{pdc})_8$  in compound **2** (along [011] direction) and **3** (along [100] direction),  
Ln-O-C-O-Ln bonds are simplified as Ln-Ln bonds

**Tab. S1.1** Selected Bond Distances (Å) and Angles (deg) of **1**<sup>a</sup>

|                           |          |                           |          |                                                |           |                                               |            |
|---------------------------|----------|---------------------------|----------|------------------------------------------------|-----------|-----------------------------------------------|------------|
| Mo(1)-O(11)               | 1.665(6) | Mo(3)-O(14)               | 1.893(6) | Mo(1) <sup>#1</sup> -O(15)-Mo(1)               | 88.5(2)   | O(12)-Mo(1)-O(15)                             | 72.96(19)  |
| Mo(1)-O(12)               | 1.907(6) | Mo(3)-O(17)               | 1.960(6) | Mo(1) <sup>#1</sup> -O(15)-Mo(1) <sup>#2</sup> | 88.5(2)   | O(13)-Mo(1)-O(15)                             | 83.0(2)    |
| Mo(1)-O(12) <sup>#1</sup> | 1.913(6) | Mo(3)-O(18) <sup>#2</sup> | 1.888(6) | Mo(1) <sup>#2</sup> -O(15)-Mo(1)               | 88.5(2)   | O(14)-Mo(1)-O(13)                             | 84.7(2)    |
| Mo(1)-O(13)               | 1.925(6) | Mo(3)-O(19) <sup>#2</sup> | 2.453(5) | Mo(1)-O(12)-Mo(1) <sup>#2</sup>                | 125.5(3)  | O(14)-Mo(1)-O(15)                             | 83.3(2)    |
| Mo(1)-O(14)               | 1.913(6) | Mo(3)-O(21) <sup>#2</sup> | 1.926(6) | Mo(2)-O(13)-Mo(1)                              | 150.6(3)  | O(19) <sup>#1</sup> -P(1)-O(15)               | 109.4(2)   |
| Mo(1)-O(15)               | 2.434(5) | Mo(3)-O(24)               | 1.672(6) | Mo(3)-O(14)-Mo(1)                              | 153.9(3)  | O(19) <sup>#1</sup> -P(1)-O(19)               | 109.5(2)   |
| Mo(2)-O(13)               | 1.875(6) | Mo(4)-O(19)               | 2.420(5) | O(11)-Mo(1)-O(12)                              | 102.3(3)  | O(19) <sup>#1</sup> -P(1)-O(19) <sup>#2</sup> | 109.5(2)   |
| Mo(2)-O(16)               | 1.691(6) | Mo(4)-O(20)               | 1.907(6) | O(11)-Mo(1)-O(12) <sup>#1</sup>                | 101.4(3)  | O(19) <sup>#2</sup> -P(1)-O(15)               | 109.4(2)   |
| Mo(2)-O(17)               | 1.855(6) | Mo(4)-O(21)               | 1.911(6) | O(11)-Mo(1)-O(13)                              | 101.9(3)  | O(19)-P(1)-O(15)                              | 109.4(2)   |
| Mo(2)-O(18)               | 1.957(6) | Mo(4)-O(22)               | 1.915(6) | O(11)-Mo(1)-O(14)                              | 102.7(3)  | O(19)-P(1)-O(19) <sup>#2</sup>                | 109.5(2)   |
| Mo(2)-O(19)               | 2.419(5) | Mo(4)-O(22) <sup>#1</sup> | 1.910(6) | O(11)-Mo(1)-O(15)                              | 172.5(3)  | P(1)-O(15)-Mo(1)                              | 126.31(16) |
| Mo(2)-O(20)               | 1.942(6) | Mo(4)-O(23)               | 1.682(6) | O(12) <sup>#1</sup> -Mo(1)-O(13)               | 88.6(2)   | P(1)-O(15)-Mo(1) <sup>#1</sup>                | 126.31(16) |
| P(1)-O(15)                | 1.531(9) | P(1)-O(19) <sup>#1</sup>  | 1.531(5) | O(12) <sup>#1</sup> -Mo(1)-O(14)               | 155.8(2)  | P(1)-O(15)-Mo(1) <sup>#2</sup>                | 126.31(16) |
| P(1)-O(19)                | 1.531(5) | P(1)-O(19) <sup>#2</sup>  | 1.531(5) | O(12) <sup>#1</sup> -Mo(1)-O(15)               | 72.88(19) | P(1)-O(19)-Mo(2)                              | 125.5(3)   |
|                           |          |                           |          | O(12)-Mo(1)-O(12) <sup>#1</sup>                | 87.5(4)   | P(1)-O(19)-Mo(3) <sup>#1</sup>                | 125.8(3)   |
|                           |          |                           |          | O(12)-Mo(1)-O(13)                              | 155.8(2)  | P(1)-O(19)-Mo(4)                              | 126.0(3)   |
|                           |          |                           |          | O(12)-Mo(1)-O(14)                              | 89.2(2)   |                                               |            |

<sup>a</sup> Symmetry transformations used to generate equivalent atoms for for **1**: #1 -y+1, x-y, z; #2 -x+y+1, -x+1, z.

**Tab. S1.2** Selected Bond Distances (Å) and Angles (deg) of **2**<sup>a</sup>

|                                  |           |                                  |           |                          |           |                           |           |
|----------------------------------|-----------|----------------------------------|-----------|--------------------------|-----------|---------------------------|-----------|
| Sm(1)-O(33)                      | 2.443(10) | Sm(2)-O(29)                      | 2.480(10) | Sm(3)-O(25)              | 2.542(10) | Sm(4)-O(21)               | 2.472(10) |
| Sm(1)-O(34)                      | 2.536(13) | Sm(2)-O(30)                      | 2.493(15) | Sm(3)-O(26)              | 2.453(8)  | Sm(4)-O(22) <sup>#3</sup> | 2.359(8)  |
| Sm(1)-O(35)                      | 2.552(10) | Sm(2)-O(31)                      | 2.627(17) | Sm(3)-O(27)              | 2.451(10) | Sm(4)-O(23)               | 2.408(9)  |
| Sm(1)-O(36)                      | 2.441(8)  | Sm(2)-O(32)                      | 2.470(11) | Sm(3)-O(28)              | 2.454(9)  | Sm(4)-O(24)               | 2.411(10) |
| Sm(1)-O(10) <sup>#2</sup>        | 2.458(8)  | Sm(2)-O(8) <sup>#4</sup>         | 2.395(7)  | Sm(3)-O(1) <sup>#1</sup> | 2.414(8)  | Sm(4)-O(2)                | 2.440(8)  |
| Sm(1)-O(11)                      | 2.453(8)  | Sm(2)-O(9)                       | 2.447(8)  | Sm(3)-O(5)               | 2.477(8)  | Sm(4)-O(3)                | 2.418(8)  |
| Sm(1)-O(12)                      | 2.464(8)  | Sm(2)-O(39)                      | 2.403(8)  | Sm(3)-O(6)               | 2.509(8)  | Sm(4)-O(4)                | 2.382(7)  |
| Sm(1)-O(37)                      | 2.467(9)  | Sm(2)-O(46)                      | 2.367(9)  | Sm(3)-O(7)               | 2.484(7)  | Sm(4)-N(4)                | 2.519(8)  |
| Sm(1)-N(1)                       | 2.519(9)  | Sm(2)-N(2)                       | 2.542(9)  | Sm(3)-N(3)               | 2.570(8)  |                           |           |
| O(2)-Sm(4)-O(21)                 | 71.7(3)   | O(22) <sup>#3</sup> -Sm(4)-O(2)  | 86.4(3)   | O(24)-Sm(4)-O(2)         | 80.5(4)   | O(4)-Sm(4)-N(4)           | 145.7(3)  |
| O(2) <sup>#3</sup> -Sm(4)-N(4)   | 63.2(3)   | O(22) <sup>#3</sup> -Sm(4)-O(21) | 79.3(4)   | O(24)-Sm(4)-O(3)         | 84.0(4)   | O(4)-Sm(4)-O(2)           | 119.9(3)  |
| O(22)-Sm(4)-N(4)                 | 74.3(3)   | O(23)-Sm(4)-O(24)                | 129.7(4)  | O(24)-Sm(4)-O(21)        | 121.3(5)  | O(4)-Sm(4)-O(23)          | 68.7(3)   |
| O(22) <sup>#3</sup> -Sm(4)-O(23) | 72.0(3)   | O(23)-Sm(4)-O(2)                 | 147.2(4)  | O(24)-Sm(4)-N(4)         | 75.4(3)   | O(4)-Sm(4)-O(3)           | 102.1(3)  |
| O(22) <sup>#3</sup> -Sm(4)-O(24) | 149.6(3)  | O(23)-Sm(4)-O(21)                | 80.0(4)   | O(3)-Sm(4)-N(4)          | 64.1(3)   | O(4)-Sm(4)-O(24)          | 72.0(3)   |
| O(22) <sup>#3</sup> -Sm(4)-O(3)  | 82.3(3)   | O(23)-Sm(4)-O(3)                 | 75.1(4)   | O(3)-Sm(4)-O(2)          | 127.2(3)  |                           |           |
| O(22) <sup>#3</sup> -Sm(4)-O(4)  | 137.6(3)  | O(23)-Sm(4)-N(4)                 | 129.5(3)  | O(4)-Sm(4)-O(21)         | 78.9(4)   |                           |           |

<sup>a</sup> Symmetry transformations used to generate equivalent atoms for **2**: #1 -x+1, -y+1, -z+1; #2 -x, -y+2, -z+2; #3 -x, -y+2, -z+1; #4 -x, -y+1, -z+2.



**Tab. S2.1** H-Bond Distances (Å) and Angles (deg) of Coordinate and free H<sub>2</sub>O molecule in 2<sup>a</sup>, H atoms add by Platon 1.15 and Olex2 1.1

| No. | Type  | Donor | --H...   | Acceptor | D - H | H...A | D...A  | D- H...A |
|-----|-------|-------|----------|----------|-------|-------|--------|----------|
| 1   |       | O(21) | --H(21B) | ..O(58)  | 0.85  | 2.38  | 2.9734 | 127      |
| 2   | Intra | O(23) | --H(23A) | ..O(11)  | 0.85  | 1.82  | 2.6542 | 168      |
| 3   |       | O(23) | --H(23B) | ..O(60)  | 0.85  | 1.96  | 2.8002 | 171      |
| 4   |       | O(24) | --H(24A) | ..O(59)  | 0.85  | 2.54  | 2.8342 | 101      |
| 5   |       | O(24) | --H(24B) | ..O(59)  | 0.85  | 2.33  | 2.8342 | 119      |
| 6   | Intra | O(25) | --H(25A) | ..O(39)  | 0.85  | 2.07  | 2.864  | 155      |
| 7   |       | O(25) | --H(25B) | ..O(41)  | 0.85  | 2.55  | 3.0519 | 119      |
| 8   | Intra | O(26) | --H(26A) | ..O(2)   | 0.85  | 1.96  | 2.7081 | 147      |
| 9   |       | O(26) | --H(26B) | ..O(57)  | 0.85  | 2.03  | 2.8813 | 177      |
| 10  | Intra | O(27) | --H(27A) | ..O(39)  | 0.85  | 2.11  | 2.8218 | 140      |
| 11  |       | O(27) | --H(27B) | ..O(53)  | 0.85  | 2.07  | 2.8417 | 150      |
| 12  |       | O(29) | --H(29A) | ..O(51)  | 0.85  | 2.26  | 2.8477 | 126      |
| 13  | Intra | O(29) | --H(29B) | ..O(7)   | 0.85  | 1.86  | 2.681  | 163      |
| 14  |       | O(30) | --H(30B) | ..O(54)  | 0.85  | 2.18  | 2.7972 | 129      |
| 15  |       | O(31) | --H(31A) | ..O(55)  | 0.85  | 1.97  | 2.8175 | 175      |
| 16  | Intra | O(32) | --H(32A) | ..O(12)  | 0.85  | 2.28  | 2.8222 | 121      |
| 17  | Intra | O(32) | --H(32B) | ..O(31)  | 0.85  | 2.43  | 3.1952 | 150      |
| 18  | Intra | O(33) | --H(33A) | ..O(9)   | 0.85  | 1.86  | 2.6644 | 158      |
| 19  |       | O(33) | --H(33B) | ..O(56)  | 0.85  | 1.96  | 2.7952 | 167      |
| 20  |       | O(34) | --H(34A) | ..O(62)  | 0.85  | 2.07  | 2.8998 | 166      |
| 21  | Intra | O(35) | --H(35A) | ..O(35)  | 0.85  | 2.19  | 2.8853 | 139      |
| 22  | Intra | O(37) | --H(37A) | ..O(3)   | 0.85  | 1.92  | 2.7697 | 174      |
| 23  |       | O(37) | --H(37B) | ..O(41)  | 0.85  | 1.96  | 2.791  | 164      |
| 24  |       | O(38) | --H(38A) | ..O(25)  | 0.85  | 2.12  | 2.8396 | 143      |
| 25  |       | O(38) | --H(38B) | ..O(88)  | 0.85  | 2.42  | 3.1866 | 150      |
| 26  |       | O(40) | --H(40A) | ..O(28)  | 0.85  | 1.91  | 2.6618 | 147      |
| 27  |       | O(40) | --H(40B) | ..O(54)  | 0.85  | 1.99  | 2.8289 | 170      |
| 28  |       | O(41) | --H(41A) | ..O(65)  | 0.85  | 2.33  | 3.1728 | 169      |
| 29  |       | O(41) | --H(41B) | ..O(25)  | 0.85  | 2.27  | 3.0519 | 153      |

"Cacl-OH" of Wingx and "Hadd" of Olex2 are used to place the hydrogen theoretically, but still there are some hydrogen atoms cannot be placed in sensible positions. According to the CIF of reference #8 ([http://pubs.acs.org/doi/suppl/10.1021/ic801846h/suppl\\_file/ic801846h\\_si\\_002.cif](http://pubs.acs.org/doi/suppl/10.1021/ic801846h/suppl_file/ic801846h_si_002.cif)), these hydrogen atoms are reserved.

**Tab. S2.2** H-Bond Distances (Å) and Angles (deg) of Coordinate and free H<sub>2</sub>O molecule in 3<sup>a</sup>, H atoms add by Platon 1.15 and Olex2 1.1

| No. | Type  | Donor | ---H...  | Acceptor | D - H | H...A | D...A  | D - H...A |
|-----|-------|-------|----------|----------|-------|-------|--------|-----------|
| 1   | Intra | O(36) | --H(1)   | ..O(33)  | 0.9   | 1.95  | 2.7729 | 148       |
| 2   |       | O(34) | --H(34A) | ..O(7)   | 0.85  | 2.42  | 3.0028 | 126       |
| 3   |       | O(34) | --H(34B) | ..O(8)   | 0.85  | 2.50  | 3.2683 | 151       |
| 4   |       | O(35) | --H(35A) | ..O(13)  | 0.85  | 2.41  | 2.9998 | 127       |
| 5   |       | O(35) | --H(35A) | ..O(17)  | 0.85  | 2.5   | 3.065  | 125       |
| 6   |       | O(35) | --H(35B) | ..F(42)  | 0.85  | 2.36  | 2.8523 | 117       |
| 7   |       | O(36) | --H(36)  | ..O(4)   | 0.85  | 2.58  | 3.1262 | 123       |
| 8   |       | O(37) | --H(37B) | ..O(16)  | 0.85  | 2.15  | 2.96   | 158       |
| 9   |       | O(38) | --H(38A) | ..O(19)  | 0.85  | 2.21  | 2.8055 | 127       |
| 10  |       | O(38) | --H(38A) | ..O(7)   | 0.85  | 2.45  | 3.2568 | 159       |
| 11  |       | O(38) | --H(38B) | ..F(42)  | 0.85  | 2.37  | 2.8532 | 117       |
| 12  |       | O(39) | --H(39A) | ..O(1A)  | 0.85  | 2.57  | 3.1948 | 131       |
| 13  |       | O(39) | --H(39A) | ..O(2)   | 0.85  | 2.27  | 2.9313 | 135       |
| 14  | Intra | O(40) | --H(40A) | ..O(30)  | 0.85  | 1.94  | 2.7671 | 164       |
| 15  |       | O(40) | --H(40B) | ..O(9)   | 0.85  | 2.32  | 3.16   | 168       |
| 16  |       | O(40) | --H(40B) | ..O(10)  | 0.85  | 2.56  | 3.0096 | 114       |
| 18  |       | O(41) | --H(41B) | ..O(11)  | 0.85  | 2.26  | 2.6987 | 112       |

"Cacl-OH" of Wingx and "Hadd" of Olex2 are used to place the hydrogen theoretically, but still there are some hydrogen atoms cannot be placed in sensible positions. According to the CIF of reference #8 ([http://pubs.acs.org/doi/suppl/10.1021/ic801846h/suppl\\_file/ic801846h\\_si\\_002.cif](http://pubs.acs.org/doi/suppl/10.1021/ic801846h/suppl_file/ic801846h_si_002.cif)), these hydrogen atoms are reserved.
